# Supplementary material
Source: PubMed Central journal article supplement (PMC4725587)
Supplement: NIHMS750881-supplement-supplement_1.pdf [file NIHMS750881-supplement-supplement_1.pdf]

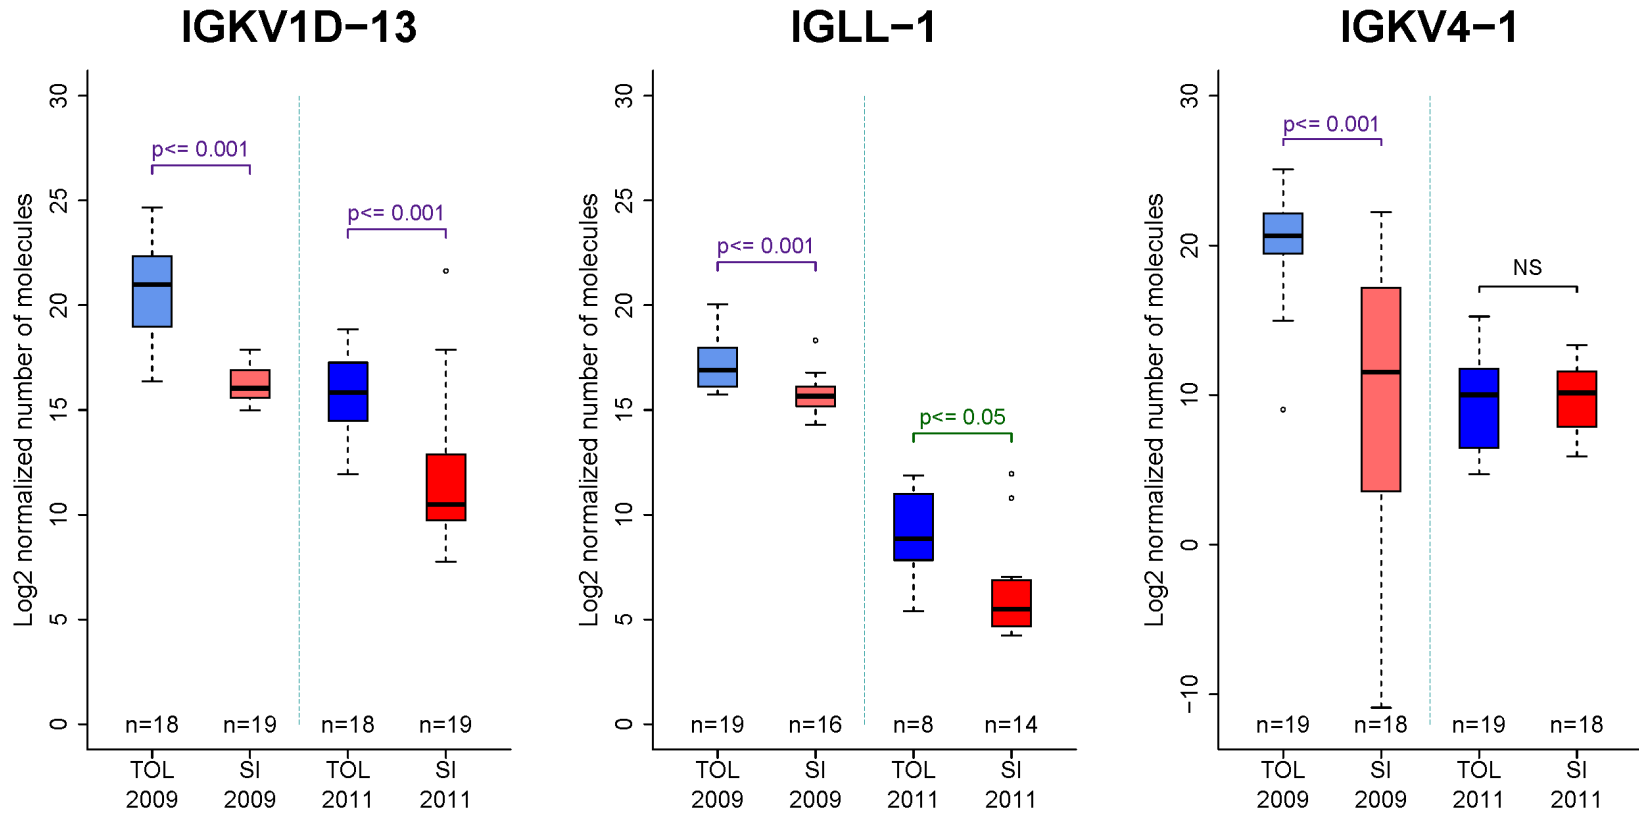

**Supplemental Figure S1:** Technical reproducibility of Sequenom analysis. The same RNA samples were tested in 2009 and 2011 using Sequenom technology. Fresh reagents were used in 2011, but the same 226 gene multiplex structure was maintained. The difference between TOL and SI samples is clearly reproducible for both IGKV1D-13 and IGLL-1. However, the absolute values are not maintained. [https://www.itntrialshare.org/FACTOR\\_figS1.url](https://www.itntrialshare.org/FACTOR_figS1.url)

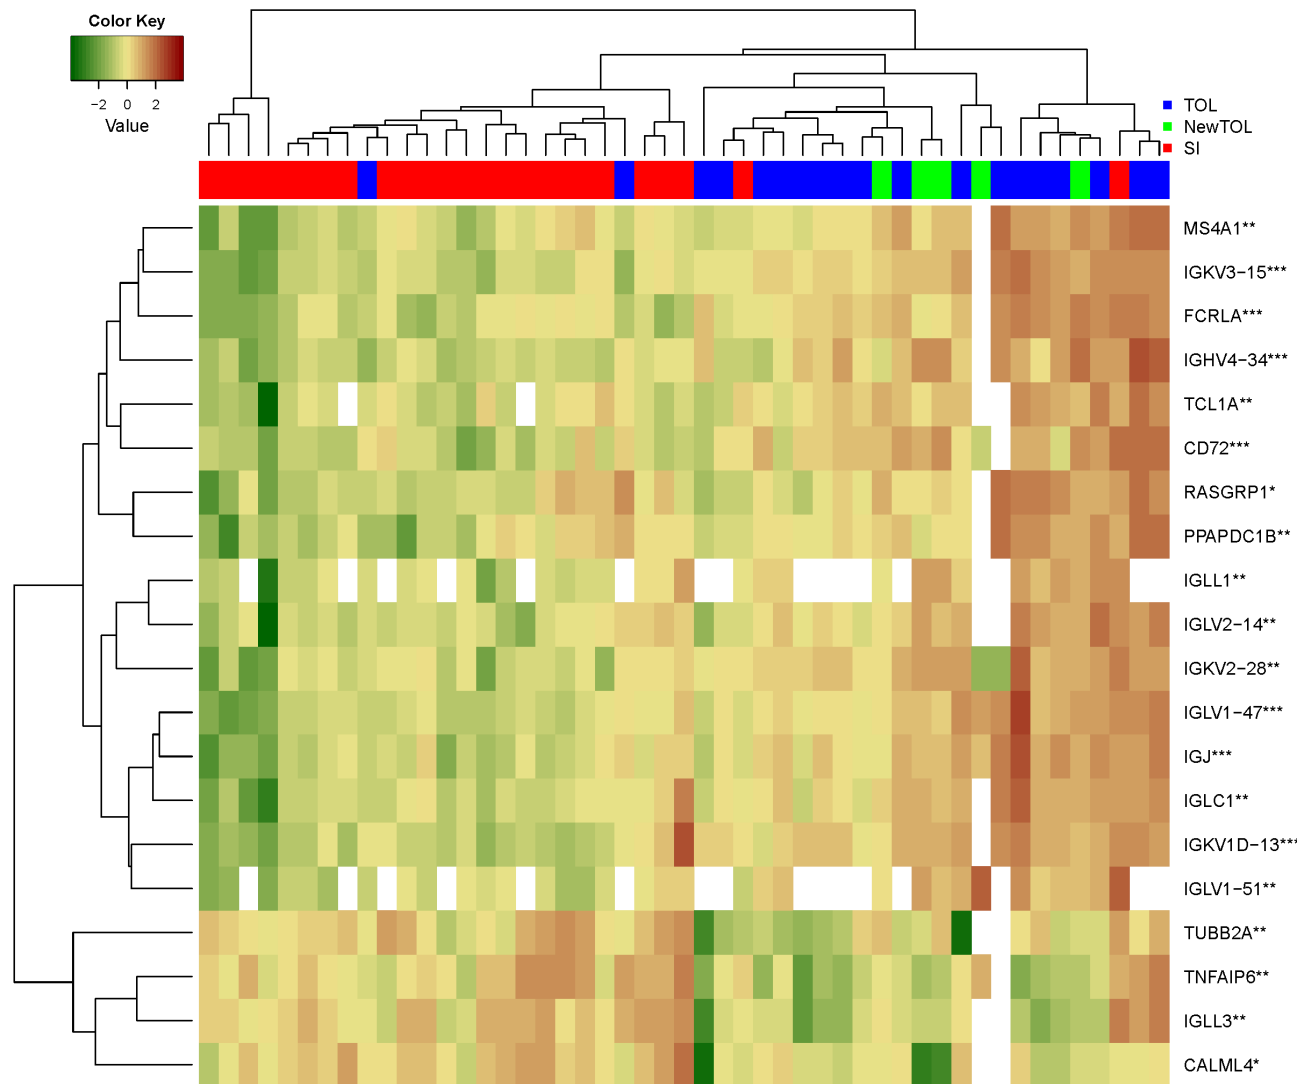

**Supplemental Figure 2:** Hierarchical clustering using Euclidean distance measure showing the top 20 genes differentially expressed between tolerant, new tolerant and standard immunosuppression participants by t-test with False Discovery Rate (FDR) correction. (\* = p-value < 0.05, \*\* = p-value < 0.005, \*\*\* = p-value < 0.001). White or blank cells show values not available due to assay limitations. Fifteen of the 20 genes are B cell specific, the exceptions being RASGRP1, PPAPDC1B, TUBB2A, TNFAIP6, and CALML4.

[https://www.itntrialshare.org/FACTOR\\_figS2.url](https://www.itntrialshare.org/FACTOR_figS2.url)

**Supplemental Table 1**

ITN507, ITN013, ITN010, & ITN036 participant specimens analyzed for gene expression, flow cytometry, and BAFF levels analysis

**ITN507**

| <b>Participant</b>         | <b>Gene Expression</b> | <b>Flow Cytometry</b> | <b>BAFF Levels</b> |
|----------------------------|------------------------|-----------------------|--------------------|
| <i><u>Tolerant</u></i>     |                        |                       |                    |
| FACTOR_551339              | <b>G</b>               |                       | <b>B</b>           |
| FACTOR_841311              | <b>G</b>               | <b>F</b>              | <b>B</b>           |
| FACTOR_150776              | <b>G</b>               | <b>F</b>              | <b>B</b>           |
| FACTOR_944735              |                        | <b>F</b>              | <b>B</b>           |
| FACTOR_191757              |                        | <b>F</b>              | <b>B</b>           |
| FACTOR_274363              |                        | <b>F</b>              | <b>B</b>           |
| FACTOR_712246              | <b>G</b>               |                       | <b>B</b>           |
| FACTOR_919105              | <b>G</b>               |                       | <b>B</b>           |
| FACTOR_681387              | <b>G</b>               | <b>F</b>              | <b>B</b>           |
| FACTOR_948987              | <b>G</b>               | <b>F</b>              | <b>B</b>           |
| FACTOR_987079              | <b>G</b>               | <b>F</b>              | <b>B</b>           |
| FACTOR_808379              | <b>G</b>               | <b>F</b>              | <b>B</b>           |
| FACTOR_701789              | <b>G</b>               | <b>F</b>              |                    |
| FACTOR_402941              | <b>G</b>               | <b>F</b>              |                    |
| FACTOR_579210              |                        | <b>F</b>              |                    |
| FACTOR_911411              | <b>G</b>               | <b>F</b>              | <b>B</b>           |
| FACTOR_909034              | <b>G</b>               | <b>F</b>              | <b>B</b>           |
| FACTOR_231375              | <b>G</b>               | <b>F</b>              | <b>B</b>           |
| FACTOR_679149              | <b>G</b>               | <b>F</b>              |                    |
| FACTOR_157168              |                        | <b>F</b>              |                    |
| FACTOR_118518              | <b>G</b>               | <b>F</b>              |                    |
| FACTOR_238870              |                        |                       | <b>B</b>           |
| FACTOR_974351              | <b>G</b>               | <b>F</b>              | <b>B</b>           |
| FACTOR_208304              | <b>G</b>               | <b>F</b>              | <b>B</b>           |
| FACTOR_541582              | <b>G</b>               | <b>F</b>              | <b>B</b>           |
| <i><u>New Tolerant</u></i> |                        |                       |                    |
| FACTOR_882447              | <b>G</b>               | <b>F</b>              | <b>B</b>           |
| FACTOR_833683              | <b>G</b>               | <b>F</b>              | <b>B</b>           |
| FACTOR_465810              | <b>G</b>               | <b>F</b>              | <b>B</b>           |
| FACTOR_645626              | <b>G</b>               | <b>F</b>              | <b>B</b>           |
| FACTOR_243751              | <b>G</b>               | <b>F</b>              | <b>B</b>           |
| FACTOR_377176              |                        | <b>F</b>              | <b>B</b>           |
| FACTOR_690732              |                        |                       | <b>B</b>           |

| <b>Participant</b>                       | <b>Gene Expression</b> | <b>Flow Cytometry</b> | <b>BAFF Levels</b> |
|------------------------------------------|------------------------|-----------------------|--------------------|
| <i><u>Standard Immunosuppression</u></i> |                        |                       |                    |
| FACTOR_662711                            | <b>G</b>               | <b>F</b>              | <b>B</b>           |
| FACTOR_553478                            | <b>G</b>               |                       | <b>B</b>           |
| FACTOR_583976                            | <b>G</b>               | <b>F</b>              | <b>B</b>           |
| FACTOR_143335                            | <b>G</b>               | <b>F</b>              | <b>B</b>           |
| FACTOR_532410                            |                        | <b>F</b>              | <b>B</b>           |
| FACTOR_743013                            | <b>G</b>               |                       | <b>B</b>           |
| FACTOR_445323                            | <b>G</b>               | <b>F</b>              | <b>B</b>           |
| FACTOR_908887                            | <b>G</b>               |                       |                    |
| FACTOR_505880                            | <b>G</b>               | <b>F</b>              |                    |
| FACTOR_671619                            | <b>G</b>               | <b>F</b>              |                    |
| FACTOR_249795                            | <b>G</b>               | <b>F</b>              |                    |
| FACTOR_212280                            |                        | <b>F</b>              |                    |
| FACTOR_762897                            | <b>G</b>               | <b>F</b>              | <b>B</b>           |
| FACTOR_193782                            | <b>G</b>               | <b>F</b>              |                    |
| FACTOR_109622                            |                        | <b>F</b>              | <b>B</b>           |
| FACTOR_213935                            |                        | <b>F</b>              |                    |
| FACTOR_278451                            | <b>G</b>               | <b>F</b>              | <b>B</b>           |
| FACTOR_245217                            | <b>G</b>               |                       | <b>B</b>           |
| FACTOR_418828                            |                        | <b>F</b>              | <b>B</b>           |
| FACTOR_405881                            | <b>G</b>               | <b>F</b>              | <b>B</b>           |
| FACTOR_700990                            | <b>G</b>               | <b>F</b>              |                    |
| FACTOR_982795                            |                        | <b>F</b>              |                    |
| FACTOR_936912                            |                        | <b>F</b>              |                    |
| FACTOR_930968                            | <b>G</b>               | <b>F</b>              |                    |
| FACTOR_930960                            |                        | <b>F</b>              |                    |
| FACTOR_850120                            | <b>G</b>               |                       |                    |
| FACTOR_439639                            | <b>G</b>               | <b>F</b>              |                    |
| FACTOR_486391                            | <b>G</b>               |                       |                    |
| FACTOR_553535                            | <b>G</b>               |                       |                    |
| FACTOR_884046                            | <b>G</b>               | <b>F</b>              | <b>B</b>           |
| FACTOR_573541                            | <b>G</b>               |                       | <b>B</b>           |
| FACTOR_853380                            | <b>G</b>               | <b>F</b>              |                    |
| FACTOR_205722                            |                        | <b>F</b>              | <b>B</b>           |
| FACTOR_432603                            | <b>G</b>               | <b>F</b>              | <b>B</b>           |

**ITN013**

---

| <b>Participant</b>                                  | <b>Gene Expression</b> |
|-----------------------------------------------------|------------------------|
| <i><u>Sirolimus Monotherapy</u></i>                 |                        |
| ITN013ST_877664                                     | G                      |
| ITN013ST_597519                                     | G                      |
| ITN013ST_187319                                     | G                      |
| ITN013ST_371019                                     | G                      |
| ITN013ST_307165                                     | G                      |
| ITN013ST_805828                                     | G                      |
| ITN013ST_561464                                     | G                      |
| <i><u>Standard Immunosuppression Multiagent</u></i> |                        |
| ITN013ST_145787                                     | G                      |
| ITN013ST_492821                                     | G                      |

**ITN010 & ITN036**

---

| <b>Participant</b>                                 | <b>Gene Expression</b> |
|----------------------------------------------------|------------------------|
| <i><u>Tolerant</u></i>                             |                        |
| ITN036ST_968123                                    | G                      |
| ITN036ST_456317                                    | G                      |
| ITN036ST_464831                                    | G                      |
| ITN010ST_14804                                     | G                      |
| ITN010ST_564051                                    | G                      |
| ITN010ST_687298                                    | G                      |
| ITN010ST_93464                                     | G                      |
| <i><u>Return to Standard Immunosuppression</u></i> |                        |
| ITN036ST_264166                                    | G                      |

**Assay Combination Legend:**

- (G) Gene Expression
- (F) Flow Cytometry Analysis
- (B) BAFF Levels

## Supplemental Table 2

232 genes of interest tested by gene expression (including six housekeeping genes)

| Gene No. | Multiplex Gene ID |          |          |            |           |             |            |          |          |          |          |          |
|----------|-------------------|----------|----------|------------|-----------|-------------|------------|----------|----------|----------|----------|----------|
|          | W1                | W2       | W3       | W4         | W5        | W6          | W7         | W8       | W9       | W10      | W11      | W12      |
| 1        | PLOD3             | IGLL1    | AKR1C3   | MRPS31     | IGHV4-34  | TSPAN5      | EIF5AP1    | IGLV1-47 | TBC1D5   | IL23A    | PLDN     | TUBB3    |
| 2        | SMAD5             | BCL2L1   | CD55     | IGF2BP2    | BLNK      | KV105_HUMAN | MAFG       | SWAP70   | HLA-C    | ZNF331   | RAD21    | IGKV3-20 |
| 3        | TGM2              | IGLV1-51 | BCL11A   | MGC33894   | GAS7      | RBPMS       | TBB3_HUMAN | FCRLA    | TAOK2    | FAM129C  | PLAUR    | TNF      |
| 4        | BMP7_HUMAN        | IL10     | BLM      | MATK       | FOXO1     | IGKC        | RAP2A      | CYP1B1   | RAD52    | IGHG2    | KLRC1    | TRDC     |
| 5        | LOXL2             | TGFBR1   | BACH2    | MSL-1      | IL8       | STAP1       | PHCA       | IGKV1-27 | SHMT2    | BIRC3    | PCDHGC5  | GPBAR1   |
| 6        | LOXL1             | TGFB2    | BBX      | IKZF3      | CXXC5     | IGKV2-28    | STRBP      | EIF5B    | IGKV2-24 | DHX9     | HLA-C_2  | VPREB3   |
| 7        | PLOD1             | TGFB1    | BTLA     | IL-1       | NFATC4    | SPTB        | PML        | PPAPDC1B | HLA-DOB  | DDHD2    | F3       |          |
| 8        | SMAD6             | HAVCR2   | BTLA_2   | MLTK_HUMAN | ARID5B    | LRRFIP1     | SDC4       | MS4A1    | SLC12A8  | IGKV1-12 | WDR67    |          |
| 9        | PDGFA             | IL6      | BCL11A_2 | MIB1       | FZD4      | AFF3        | RELB       | RASGRP1  | TCL1A    | RAD50    | IGHD     |          |
| 10       | EDN1              | CD3E     | FNBP2    | CD38       | UPP1      | SFRP2       | RHOH       | IGKV3-15 | ROCK1    | Klrk1    | PPP3CA   |          |
| 11       | SMAD7             | TGFBR3   | CXCL3    | RPL14      | KCNJ2     | USP34       | SLAMF7     | GPR114   | DEFA4    | CALML4   | ICAM1    |          |
| 12       | CTGF              | PECAM1   | EBI2     | NFAT5      | PDE4B     | PPAPDC1B_2  | IGLL3      | KIAA0746 | SLC2A3   | DYHC     | IGHM     |          |
| 13       | LOX               | TGFB3    | CDK6     | MEF2C      | PTCH1     | CD72        | SESTD      | SON      | TSPAN3   | KLRB1    | YWHAE    |          |
| 14       | FGF2              | IFNG     | CXCL4    | PALM2      | KLRC2     | CXCL1       | RPS6       | C9orf45  | TRA2A    | IRF-4    | UBC      |          |
| 15       | HGF               | TBX21    | BMP6     | NBPF16     | ZBTB10    | GFOD2       | RAB38      | IGKV4-1  | USP10    | ESPN     | OR13C4   |          |
| 16       | SPG3A             | TGFBR2   | CD79B    | NFKB2      | CUGBP1    | CXCL2       | SMURF1     | IGLC1    | IGLV2-14 | PPP1R12A | NR4A3    |          |
| 17       | SMAD3             | HAVCR1   | KLRD1    | P2RX5      | RAB5C     | TPD52       | TUBB2A     | ADARB1   | CD160    | MS4A1_2  | ZNF295   |          |
| 18       | PLOD2             | CD40     | CXorf38  | SPEN       | IGKV1D-13 | CEP350      | TSPAN13    | ATRX     | GNA11    | SF3B1    | IGHA1    |          |
| 19       | SMAD1             | SPIB     | EIF2S1   | ZNF267     | JAK1      | NKG2F_HUMAN | SH2D1B     | IGJ      | TUBB4    | RAB2A    | POLR3H   |          |
| 20       | SMAD2             | IL2RA    | FEZ1     | PTGDR      | SYNPO2L   | CCL20       | TNFAIP6    | SAMD9L   | BACH2_2  | KLRC3    | IGKV1-33 |          |

Housekeeping genes: GAPDH, UBC, HPTR1, TBP, B2M, YWHAZ

**Supplemental Table 3**

Intersection of statistically significant genes comparing SI vs. TOL in the current experiment and Newell KA et al., J Clin Invest. 2010

| <b>Gene</b> | <b>Number of SI in current exp.</b> | <b>Number of TOL in current exp.</b> | <b>p-value in current exp.</b> | <b>Number of SI in Newell et al. 2010</b> | <b>Number of TOL in Newell et al. 2010</b> | <b>p-value in Newell et al. 2010</b> |
|-------------|-------------------------------------|--------------------------------------|--------------------------------|-------------------------------------------|--------------------------------------------|--------------------------------------|
| ADARB1      | 24                                  | 19                                   | 0.0127                         | 23                                        | 19                                         | 0.0125                               |
| ARID5B      | 24                                  | 19                                   | 0.0013                         | 23                                        | 18                                         | 0.0109                               |
| BACH2_2     | 24                                  | 19                                   | 0.0310                         | 24                                        | 18                                         | 0.0129                               |
| BLNK        | 24                                  | 19                                   | 0.0079                         | 23                                        | 19                                         | 0.0193                               |
| EBI2        | 24                                  | 19                                   | 0.0160                         | 24                                        | 18                                         | 0.0087                               |
| FCRLA       | 24                                  | 19                                   | <0.001                         | 22                                        | 18                                         | <0.001                               |
| FOXO1       | 24                                  | 19                                   | 0.0041                         | 24                                        | 19                                         | 0.0097                               |
| IGHA1       | 24                                  | 18                                   | 0.0173                         | 24                                        | 19                                         | 0.0018                               |
| IGHD        | 24                                  | 19                                   | 0.0211                         | 20                                        | 19                                         | 0.0051                               |
| IGHV4-34    | 24                                  | 19                                   | <0.001                         | 24                                        | 19                                         | <0.001                               |
| IGJ         | 24                                  | 19                                   | <0.001                         | 24                                        | 19                                         | <0.001                               |
| IGKC        | 24                                  | 19                                   | 0.0216                         | 24                                        | 19                                         | <0.001                               |
| IGKV1-27    | 23                                  | 19                                   | 0.0106                         | 24                                        | 19                                         | 0.0023                               |
| IGKV1D-13   | 24                                  | 19                                   | <0.001                         | 19                                        | 18                                         | <0.001                               |
| IGKV2-28    | 24                                  | 19                                   | <0.001                         | 11                                        | 16                                         | 0.0181                               |
| IGKV3-15    | 24                                  | 19                                   | <0.001                         | 11                                        | 17                                         | 0.0219                               |
| IGKV3-20    | 24                                  | 18                                   | 0.0025                         | 24                                        | 19                                         | <0.001                               |
| IGLC1       | 24                                  | 19                                   | <0.001                         | 24                                        | 16                                         | 0.0014                               |
| IGLL1       | 19                                  | 8                                    | 0.0011                         | 16                                        | 19                                         | <0.001                               |
| IGLV1-47    | 24                                  | 19                                   | <0.001                         | 24                                        | 19                                         | 0.0136                               |
| KIAA0746    | 24                                  | 19                                   | 0.0056                         | 21                                        | 18                                         | 0.0102                               |
| KV105_HUMAN | 24                                  | 19                                   | 0.0116                         | 24                                        | 19                                         | <0.001                               |
| MS4A1       | 24                                  | 19                                   | 0.0013                         | 24                                        | 19                                         | <0.001                               |
| MS4A1_2     | 24                                  | 18                                   | 0.0133                         | 23                                        | 18                                         | <0.001                               |
| PLAUR       | 24                                  | 18                                   | 0.0121                         | 24                                        | 19                                         | 0.0321                               |
| PPAPDC1B    | 24                                  | 19                                   | <0.001                         | 22                                        | 19                                         | 0.0014                               |
| PPAPDC1B_2  | 24                                  | 18                                   | 0.0141                         | 19                                        | 17                                         | 0.0102                               |
| PTCH1       | 24                                  | 19                                   | 0.0199                         | 23                                        | 19                                         | 0.0269                               |
| STAP1       | 24                                  | 18                                   | 0.0030                         | 20                                        | 18                                         | 0.0042                               |
| SWAP70      | 24                                  | 19                                   | 0.0043                         | 24                                        | 19                                         | 0.0095                               |
